# Supplementary material for: LlWRKY39 is involved in thermotolerance by activating LlMBF1c and interacting with LlCaM3 in lily (Lilium longiflorum)
Source: PubMed Central journal article supplement (PMC7862462; doi:10.1038/s41438-021-00473-7), 2021-02-04
Supplement: 41438_2021_473_MOESM2_ESM.pdf [file 41438_2021_473_MOESM2_ESM.pdf]

## **Supplementary information**

This file contains Supplementary Tables S1-S3.

**Supplementary Table. S1 Predication of cis-element of *LIWRKY39***

| Element name  | Function                                                                                                                                                                                                                                  | Core sequence    | Number |
|---------------|-------------------------------------------------------------------------------------------------------------------------------------------------------------------------------------------------------------------------------------------|------------------|--------|
| CAATBOX       | enhancer of transcription                                                                                                                                                                                                                 | CAAT             | 7      |
| TATABOX       | transcription initiation site                                                                                                                                                                                                             | TTATTT           | 2      |
| I-BOX         | light response element                                                                                                                                                                                                                    | GATAA            | 2      |
| MYB1AT        | binding site of MYB and MYC transcription factors involved in ABA                                                                                                                                                                         | WAACCA           | 1      |
| GATA-BOX      | light response element                                                                                                                                                                                                                    | GATA             | 4      |
| CCAAT-BOX     | heat stress related elements                                                                                                                                                                                                              | CCAAT            | 4      |
| W-BOX         | binding sites for WRKY                                                                                                                                                                                                                    | (T)(T)TGAC(C/T ) | 2      |
| AAAG-element  | binding sites of transcription factor Dof                                                                                                                                                                                                 | AAAG             | 10     |
| TAAAG-element | binding sites of transcription factor Dof that is involved in regulating the expression of specific genes in guard cells                                                                                                                  | TAAAG            | 2      |
| POLASIG1      | seed germination related elements                                                                                                                                                                                                         | AATAA            | 1      |
| POLLEN1       | pollen specific expression of the necessary elements                                                                                                                                                                                      | AGAAA            | 8      |
| GARE          | the gibberellin-responsive element was found in the promoter of the cysteine protease gene in the aleurone layer of barley, which was involved in the inhibition of the expression of the $\alpha$ amylase gene by glucose in rice embryo | TTTTTTCC         | 1      |
| PYRIMIDINEBOX | gibberellin response element is involved in inhibiting the expression of the $\alpha$ amylase gene by glucose in rice embryo                                                                                                              | CCTTTT           | 2      |
| ROOT element  | root expression-related elements                                                                                                                                                                                                          | ATATT            | 2      |

**Supplementary Table. S2 Predication of cis-element of *LIMBF1c***

| Element name      | Function                                                                                                                              | Core sequence   | Number |
|-------------------|---------------------------------------------------------------------------------------------------------------------------------------|-----------------|--------|
| CAATBOX<br>1      | enhancer of transcription                                                                                                             | CAAT            | 6      |
| W-BOX             | binding sites for WRKY                                                                                                                | (T)(T)TGAC(C/T) | 12     |
| MYB2AT            | binding site for ATMYB2 that are responsive to drought stress in Arabidopsis                                                          | TAACTG          | 1      |
| TATABOX           | transcription initiation site                                                                                                         | TTATTT          | 2      |
| CCAAT-<br>BOX     | heat stress related elements                                                                                                          | CCAAT           | 2      |
| I-BOX             | light response element                                                                                                                | GATAA           | 1      |
| GATA-BOX          | light response element                                                                                                                | GATA            | 8      |
| TAAAG-<br>element | binding site of zinc finger transcription factor Dof, which is involved in regulating the expression of specific genes in guard cells | TAAAG           | 3      |
| POLASIG1          | seed germination related elements                                                                                                     | AATAA           | 1      |
| MYB1AT            | binding site of MYB and MYC transcription factors involved in ABA                                                                     | WAACCA          | 1      |
| MYBCORE           | binding sites of MYB transcription factor in the epidermis of petunia petals                                                          | CNGTTR          | 2      |
| ROOT<br>element   | root expression-related elements                                                                                                      | ATATT           | 4      |
| E-BOX             | elements in the promoter of the storage protein gene                                                                                  | CANNTG          | 2      |

**Supplementary Table. S3 The primers used in this article**

| Name                                                    | Sequences(5'to3')              |
|---------------------------------------------------------|--------------------------------|
| <b>Primers for gene cloning</b>                         |                                |
| <i>LIWRKY39-F</i>                                       | ATGGAAGAGGTTGACTCAGCCA         |
| <i>LIWRKY39-R</i>                                       | TTATGCATGGGCAGATTGTGTT         |
| <b>Primers for Subcellular localization</b>             |                                |
| <i>LIWRKY39- Xba I-F</i>                                | ACTCTAGAATGGAAGAGGTTGACTCAGCCA |
| <i>LIWRKY39- BamH I-R</i>                               | CGGGATCCTTATGCATGGGCAGATTGTGTT |
| <b>Primers for transactivation assay</b>                |                                |
| <i>BD-LIWRKY39-EcoR I-F</i>                             | CGGAATTCATGGAAGAGGTTGACTCAGCCA |
| <i>BD-LIWRKY39-BamH I-R</i>                             | CGGGATCCTTATGCATGGGCAGATTGTGTT |
| <b>Primers for overexpression in <i>Arabidopsis</i></b> |                                |
| <i>LIWRKY39- Xba I-F</i>                                | ACTCTAGAATGGAAGAGGTTGACTCAGCCA |
| <i>LIWRKY39- BamH I-R</i>                               | CGGGATCCTTATGCATGGGCAGATTGTGTT |
| <b>Primers for RT-PCR</b>                               |                                |
| <i>RT-LIWRKY39-F</i>                                    | ATCACCATGATGAGCTGCAGAGCAG      |
| <i>RT-LIWRKY39-R</i>                                    | GCAGATTGTGTTAGTAGCTTGGGGT      |
| <b>Primers for qRT-PCR</b>                              |                                |
| <i>qRT-AtMBF1c-F</i>                                    | AGCAGATAACCAGGAGCAGT           |
| <i>qRT-AtMBF1c-R</i>                                    | TTCGGATCGCGTAGGTCTTG           |
| <i>qRT-AtAPX1-F</i>                                     | ATTCAGATGCCCAGAAGTCTTGTTC      |
| <i>qRT-AtAPX1-R</i>                                     | ACCACCGATCCAGACACTGTACTTCC     |
| <i>qRT-AtHSP101-F</i>                                   | ATGTTGGTCCAGGAAAGGT            |
| <i>qRT-AtHSP101-R</i>                                   | TGAAATCGACTGTCTGCCT            |
| <i>qRT-AtHSP70-F</i>                                    | GAGAGGGCACGAACAAAGGA           |
| <i>qRT-AtHSP70-R</i>                                    | GTCCTCAGCCGACACATTCA           |
| <i>qRT-AtAPX2-F</i>                                     | TCAGGATTCGAGGGTGCATG           |
| <i>qRT-AtAPX2-R</i>                                     | AAGGCATCCTCATCTGCAGC           |
| <i>qRT-AtGolS1-F</i>                                    | AGCCACCGGCTCTTACTTC            |
| <i>qRT-AtGolS1-R</i>                                    | G TTCAGCGAAAGGAGTCGGA          |
| <i>AtActin2-F</i>                                       | TCCCTCAGCACATTCCAGCAGAT        |
| <i>AtActin2-R</i>                                       | AACGATTCCCTGGACCTGCCTCATC      |
| <i>qRT-AtHSFB2A-F</i>                                   | CTCTCAGCCTGCTATGGCCGCGGCTG     |
| <i>qRT-AtHSFB2A-R</i>                                   | GTGCAGTGGTGCAGCTCGTTGTCCTCTG   |
| <i>qRT-AtDREB2A-F</i>                                   | CAGTGTGCCAACGGTTCAT            |
| <i>qRT-AtDREB2A-R</i>                                   | AAACGGAGGTATTCCGTAGTTGAG       |
| <i>qRT-AtHSFA2-F</i>                                    | GTGTTGAGGTTGGGCAATACG          |
| <i>qRT-AtHSFA2-R</i>                                    | TTGCTGTTGCCTCAACCTAACTAC       |
| <i>qRT-AtHSFA3-F</i>                                    | CCAAGGAATTTCAAACACAACA         |
| <i>qRT-AtHSFA3-R</i>                                    | TCGTTAGCGAATTCCCCTT            |
| <i>qRT-AtWRKY39-F</i>                                   | TGCGGAAGTCGAAGCAAATGTCA        |
| <i>qRT-AtWRKY39-R</i>                                   | CGTGGATGCGGTGAACCCTTTAT        |
| <i>qRT-AtHSFA1a-F</i>                                   | CCAGATAACCACAATTGACACGAGAG     |

|                                                                                  |                                                             |
|----------------------------------------------------------------------------------|-------------------------------------------------------------|
| <i>qRT-AtHSEF1a-R</i>                                                            | GGTATTCCCTCAAGCTGAATCG                                      |
| <i>qRT-LIMBF1c-F</i>                                                             | GCTGATTAACGAGCGGGTGC                                        |
| <i>qRT-LIMBF1c-R</i>                                                             | CACCCGCTCCATCTTCGCAAG                                       |
| <i>qRT-LIWRKY39-F</i>                                                            | CTTGGAGGAAATATGGGCAGAAGCC                                   |
| <i>qRT-LIWRKY39-R</i>                                                            | GTGTTAGTAGCTTGGGGTGG                                        |
| <i>qRT-L1CaM3-F</i>                                                              | CATGTCATGACTAACCTAGGCGAG                                    |
| <i>qRT-L1CaM3-R</i>                                                              | CCATTAGAAATCAGCCAGCACC                                      |
| <i>qRT-L1DREB2B-F</i>                                                            | CTTTGCAGGGAGGGAGCTTGTCT                                     |
| <i>qRT-L1DREB2B-R</i>                                                            | ACTAGCAGCATACTAGCCTAATCCCT                                  |
| <i>qRT-LIHSEF1-F</i>                                                             | ATGGGAAGTGTCTATGTGGGG                                       |
| <i>qRT-LIHSEF1-R</i>                                                             | CATTGATACTTGGCAGTTGTTGG                                     |
| <i>qRT-LIHSEF2-F</i>                                                             | CAGACTGAGGTCGAGTTGGAAG                                      |
| <i>qRT-LIHSEF2-R</i>                                                             | AACACAGCCCTCTTATCTTCTCG                                     |
| <b>Primers for isolation of promoter of <i>LIWRKY39</i> and <i>LIMBF1c</i></b>   |                                                             |
| <i>LAD1</i>                                                                      | ACGATGGACTCCAGAGCGGCCGC(G/C/A)N(G/C/A)NNNG<br>GAA           |
| <i>LAD2</i>                                                                      | ACGATGGACTCCAGAGCGGCCGC(G/C/T)N(G/C/T)NNNG<br>GTT           |
| <i>LAD3</i>                                                                      | ACGATGGACTCCAGAGCGGCCGC(T/A/C)N(A/G/C)NNNC<br>CAC           |
| <i>LAD4</i>                                                                      | ACGATGGACTCCAGAGCGGCCGC(G/C/A)(G/C/A)N(G/C/A)<br>)NNNCAA    |
| <i>LAD5</i>                                                                      | ACGATGGACTCCAGAGCGGCCGC(G/C/T)(G/A/T)N(G/C/T)<br>NNNCGGT    |
| <i>AC1</i>                                                                       | ACGATGGACTCCAGAG                                            |
| <i>LIWRKY39-R1</i>                                                               | AGGAGATCTGTTGAGTGCTCTAACCT                                  |
| <i>LIWRKY39-R2</i>                                                               | GCCTCCATGTTTGAGCCTGGAGGGT                                   |
| <i>LIWRKY39-R3</i>                                                               | GGCAGCTCTGTACAGCAGCTCTGCTGGC                                |
| <i>LIMBF1c-R1</i>                                                                | ATTGTCACCAATTTCCCGGGGACCATCCA                               |
| <i>LIMBF1c-R2</i>                                                                | AGCCTGTTTCCCGTACCTAGACAAGTCGT                               |
| <i>LIMBF1c-R3</i>                                                                | GACGGAGTCGGGGCTTTTTGGGACATCCTTAC                            |
| <b>Primers for calibration of promoter of <i>LIWRKY39</i> and <i>LIMBF1c</i></b> |                                                             |
| <i>LIWRKY39-F1</i>                                                               | TAATACTGGTTCGGGTCGGCG                                       |
| <i>LIWRKY39-F2</i>                                                               | ACCTCTCAGGTCGGGAACTTT                                       |
| <i>LIWRKY39-R</i>                                                                | CAGCTCTGTACAGCAGCTCTGCTGGC                                  |
| <i>LIMBF1c-F1</i>                                                                | CGGCCGCGAGTAGGGAAACTGCGAAG                                  |
| <i>LIMBF1c-F2</i>                                                                | ATACGGGTTACCGAAAGGGCTACTA                                   |
| <i>LIMBF1c-R</i>                                                                 | TGATGATGATAGAGAAGTCAACAAGG                                  |
| <b>Primers for promoter activity assay of <i>LIWRKY39</i></b>                    |                                                             |
| <i>LUC-LIWRKY39-Kpn I-F</i>                                                      | TTGTAATACGACTCACTATAGGGCGAATTGGGTACCACC<br>CTCTCAGGTCGGGAAC |
| <i>LUC-LIWRKY39-Xho I-R</i>                                                      | TTCGATATCAAGCTTATCGATACCGTCGACCTCGAGCTTG<br>GATTCAGCAGCTCAG |

---

**Primers for BIFC vectors construction**

---

*YCE-LIWRKY39-Xba* I-F TCATTTGGAGAGAACACGGGGGACTCTAGAATGGAAGA  
GGTTGACTCAGCC

*YCE-LIWRKY39-Kpn* I-R ATCGTATGGGTACATCCCGGGAGCGGTACCTGCATGGGC  
AGATTGTGTTA

*YNE-LIWRKY39-Xba* I-F TCATTTGGAGAGAACACGGGGGACTCTAGAATGGAAGA  
GGTTGACTCAGCC

*YNE-LIWRKY39-Kpn* I-R CAACTTTTGCTCCATCCCGGGAGCGGTACCTGCATGGGC  
AGATTGTGTTA

*YCE-LiCaM3-Xba* I-F TCATTTGGAGAGAACACGGGGGACTCTAGAATGGCGGA  
TCAGCTCACTGAT

*YCE-LiCaM3-Kpn* I-R ATCGTATGGGTACATCCCGGGAGCGGTACCCTTAGCCAT  
CATGACTTTGAC

*YNE-LiCaM3-Xba* I-F TCATTTGGAGAGAACACGGGGGACTCTAGAATGGCGGA  
TCAGCTCACTGAT

*YNE-LiCaM3-Kpn* I-R CAACTTTTGCTCCATCCCGGGAGCGGTACCCTTAGCCAT  
CATGACTTTGAC

---

**Primers for FLC vectors construction**

---

*cLUC-LIWRKY39-Kpn* I-F CAGATCTCGTACGCGTCCCGGGGCGGTACCATGGAAGA  
GGTTGACTCAGCCAGCA

*cLUC-LIWRKY39-Sal* I-R ATGATACGAACGAAAGCTCTGCAGGTTCGACTTATGCATG  
GGCAGATTGTGTTAGT

*nLUC-LIWRKY39-Kpn* I-F GGAGAGAACACGGGGGACGAGCTCGGTACCATGGAAG  
AGTTGACTCAGCCAGCA

*nLUC-LIWRKY39-Sal* I-R GCCCGGGACGCGTACGAGATCTGGTTCGACTGCATGGG  
CAGATTGTGTTAGT

*cLUC-LiCaM3-Kpn* I-F CAGATCTCGTACGCGTCCCGGGGCGGTACCATGGCGGAT  
CAGCTCACTGATGAC

*cLUC-LiCaM3-Sal* I-R ATGATACGAACGAAAGCTCTGCAGGTTCGACTCACTTAGC  
CATCATGACTTTGAC

*nLUC-LiCaM3-Kpn* I-F GGAGAGAACACGGGGGACGAGCTCGGTACCATGGCGG  
ATCAGCTCACTGATGAC

*nLUC-LiCaM3-Sal* I-R GCCCGGGACGCGTACGAGATCTGGTTCGACCTTAGCCAT  
CATGACTTTGAC

---

**Primers for dual-luciferase vectors construction**

---

*SK-LIWRKY39-Xba* I-F GAGCTCCACCGCGGTGGCGGCCGCTCTAGAATGGAAGA  
GGTTGACTCAGCCAGCA

*SK-LIWRKY39-BamH* I-R TGATATCGAATTCCTGCAGCCCGGGGATCCTTATGCATG  
GGCAGATTGTGTTAGT

*SK-LiCaM3-Xba* I-F GAGCTCCACCGCGGTGGCGGCCGCTCTAGAATGGCGGA  
TCAGCTCACTGATGAC

*SK-LiCaM3-BamH* I-R TGATATCGAATTCCTGCAGCCCGGGGATCCTCACTTAG  
CCATCATGACTTTGAC

---

|                                                          |                                                                  |
|----------------------------------------------------------|------------------------------------------------------------------|
| <i>LUC-LIMBF1c-Kpn I-F</i>                               | TTGTAATACGACTCACTATAGGGCGAATTGGGTACCCGG<br>CCGCGAGTAGGGAAACT     |
| <i>LUC-LIMBF1c-Xho I-R</i>                               | TTCGATATCAAGCTTATCGATACCGTCGACCTCGAGTGAT<br>GATGATAGAGAAGTCA     |
| <b>Primers for yeast one-hybrid vectors construction</b> |                                                                  |
| <i>pHis2-ProMBF1C-EcoR I-F</i>                           | CGGAATTCTAGTCAAATTAGTCAAATTAGTCAAATTAGTC<br>AAATTAGTCAAATGAGCTC  |
| <i>pHis2-ProMBF1C-XhoI-R</i>                             | GAGCTCATTGACTAATTTGACTAATTTGACTAATTTGAC<br>TAATTTGACTAGAATTCCG   |
| <i>AD-LIWRKY39-Nde I-F</i>                               | GGAATTCCATATGATGGAAGAGGTTGACTC                                   |
| <i>AD-LIWRKY39-BamH I-R</i>                              | CGGGATCCATTTATGCATGGGCAGATTGTG                                   |
| <b>Primers for EMSA</b>                                  |                                                                  |
| W-box-F                                                  | ACTAAAAATTATAGTCAAATTACATCATAAACTAAAAATT<br>ATAGTCAAATTACATCATAA |
| W-box-R                                                  | TTATGATGTAATTTGACTATAATTTTATGATGTAA<br>TTTACTATAATTTTAGT         |
